# Supplementary material for: Acetylated Trifluoromethyl Diboronic Acid Anthracene with a Large Stokes Shift and Long Excitation Wavelength as a Glucose-Selective Probe
Source: MDPI journal article supplement (doi:10.3390/app12062782), 2022-03-08
Supplement: s1 [file s1]

Supplementary Materials for

## Acetylated Trifluoromethyl Diboronic Acid Anthracene with a Large Stokes Shift and Long Excitation Wavelength as a Glucose-Selective Probe

Hongsik Choi †, Inhyeok Song †, Chul Soon Park, Heung-seop Yim \* and Joong Hyun Kim \*Drug Manufacturing Center, Daegu-Gyeokbok Medical Innovation Foundation, Chumbok-ro 80, Dong-gu, Daegu, Republic of Korea;

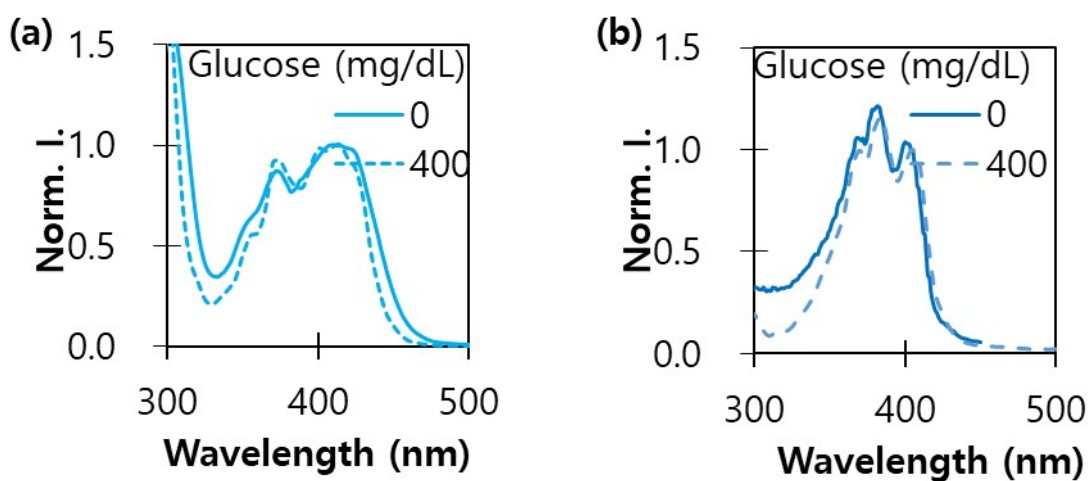

**Figure S1.** Glucose dependence of excitation spectra of AcTDA (a), and TDA (b). Excitation intensity was normalized at the maximum excitation of each dye. The fixed emission wavelength for AcTDA and TDA was 490 nm and 430 nm respectively.

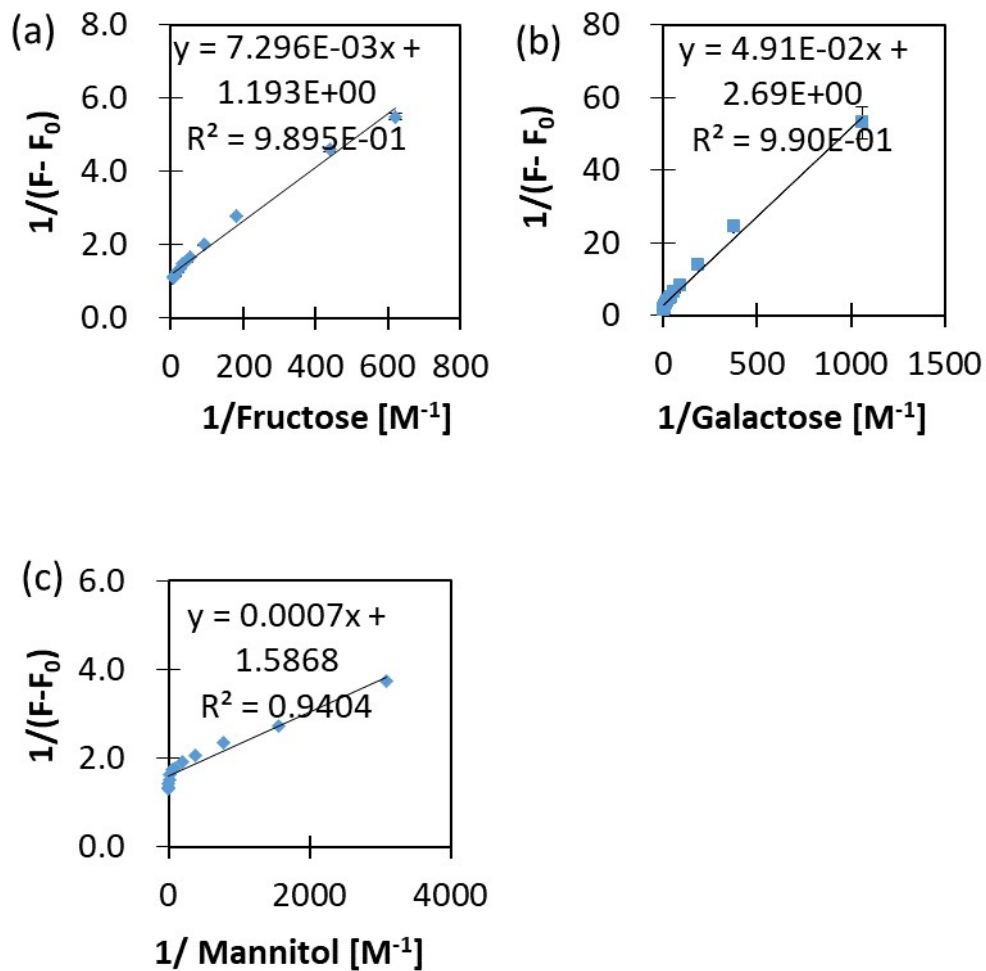

**Figure S2.** The modified Benesi-Hildebrand plot of AcTDA with fructose (a), galactose (b), and mannitol (c)

$$M + DA = M \cdot DA \quad (1)$$

,where M is free mannitol, DA is free Diboronic acid anthracene, and M·DA is M-DA complex.

$$\text{Dissociation constant } K_d = [M \cdot DA] / ([M] + [DA]) \quad (2)$$

$$\text{Fraction bound DA} = [M \cdot DA] / ([DA] + [M \cdot DA]) \quad (3)$$

From (1), (2) and (3)

$$\text{Fraction bound DA} = [M] / (K_d + [M]) \quad (4)$$

(4) becomes

$$[M] / \text{Fraction bound DA} = K_d + [M] \quad (5)$$

Plotting  $[M]/\text{Fraction bound DA}$  vs  $[M]$  gives a straight line with slope 1 and intercept  $K_d$

$$[M \cdot DA] = \epsilon F_{\text{bound}} \quad (6)$$

where  $\epsilon$  is a coefficient, which is a function of a fluorescence measuring instrument, a container where a sample is placed, and the complex

$$F_{\text{total}} = F_{\text{bound}} + F_{\text{unbound}} \quad (7)$$

$$F_{\text{bound}} = F_{\text{total}} - F_{\text{unbound}} \quad (8)$$

$$[M \cdot DA] = \epsilon (F_{\text{total}} - F_{\text{unbound}}) \quad (9)$$

When  $M$  is 5000 mg/dL,  $F_{\text{total}} = F_{\text{sat}} = 8044927$ .

When  $M$  is 0,  $F_{\text{total}} = F_{\text{unbound}} = 480810$  and  $F_{\text{unbound}} / F_{\text{sat}} = 0.06$ . Since  $F_{\text{unbound}}$  at saturation should be smaller than 480810,  $F_{\text{unbound}} / F_{\text{sat}}$  is much smaller than 0.06. Therefore, we could assume when  $F_{\text{total}}$  is saturated,  $F_{\text{total}} \gg F_{\text{unbound}}$ . In addition, we assumed when  $M_0 \gg DA_0$ , most of  $DA$  forms the complex with  $M$  at saturation

Then

$$\epsilon = [DA]_0 / F_{\text{sat}} \quad (10)$$

From (10), the calculated  $\epsilon$  was  $2.49 \times 10^{-13}$

Using  $\epsilon$ , we calculated  $[M]/\text{Fraction bound DA}$  and obtained a liner plot as shown in Figure S3

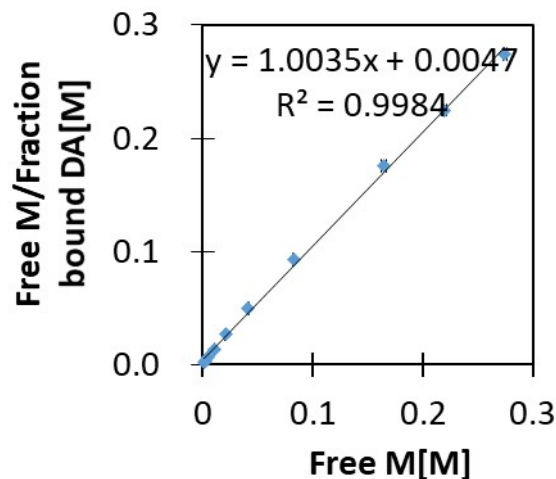

**Figure S3.** Association constant of AcTDA for mannitol. In order to minimize contribution of unbound  $DA$  to the total fluorescence, we used fluorescence value at least 10 fold higher than fluorescence at  $M = 0$ . Since the amount of mannitol is always much higher than the dye, we assumed  $[M]_0$  was equal to  $[M]$
